# Supplementary material for: Polygenic Models Partially Predict Muscle Size and Strength but Not Low Muscle Mass in Older Women
Source: MDPI journal article supplement (doi:10.3390/genes13060982), 2022-05-30
Supplement: s1 [file s1]

## Supplementary Tables

**Table S1.** Previous associations of single nucleotide polymorphisms with body composition/muscle-related phenotypes/performance.

| Single nucleotide polymorphisms | Phenotype                     | Previous literature for selection of SNPs and the outcome measures                                                                                                      | Score allocation for genotype in the present study |
|---------------------------------|-------------------------------|-------------------------------------------------------------------------------------------------------------------------------------------------------------------------|----------------------------------------------------|
| <i>ACTN3</i> rs1815739          | Muscle size                   | XX genotype had lower mid-thigh area than RX/RR (Zempo et al., 2010) [37]                                                                                               | RR=2, RX=1, XX=0                                   |
|                                 | Knee extension torque         | XX genotype had lower knee torque than RR/RX. (Walsh et al., 2008) [33]                                                                                                 |                                                    |
|                                 | Sarcopenia                    | XX genotype at higher risk of sarcopenia (Cho et al., 2017) [6]                                                                                                         |                                                    |
|                                 | Elite sprint athlete status   | RR genotype overrepresented in elite sprinter group versus controls (Chen et al., 2020) [5]                                                                             |                                                    |
| <i>ACE</i> rs4341 (I/D)         | Lean mass                     | D allele favourable for higher lean mass (Charbonneau et al., 2008) [4]                                                                                                 | DD=2, ID=1, II=0                                   |
| <i>CNTF</i> rs1800169           | Knee flexion                  | A-allele carriers weaker than GG homozygotes in middle aged women (De Mars et al., 2007) [9]                                                                            | AA=0, AG=1, GG=2                                   |
|                                 | Knee extension                | G-allele favourable for knee strength among elderly (He et al., 2020) [16]                                                                                              |                                                    |
|                                 | Handgrip strength             | AA homozygotes had 3.8 kg weaker handgrip strength than G-allele carriers (Arking et al., 2006)[2]                                                                      |                                                    |
| <i>CNTFR</i> rs2070802          | Knee extension and flexion    | T-allele carriers could produce greater torque (De Mars et al., 2007) [9]                                                                                               | TT=2, AT=1, AA=0                                   |
| <i>ESR1</i> rs4870044           | Sarcopenia                    | T-allele carriers had higher risk of sarcopenia (Khanal et al., 2020) [19]                                                                                              | CC=2, CT=1, TT=0                                   |
| <i>ESR1</i> rs1999805           |                               |                                                                                                                                                                         | AA=2, AG=1, GG=0, (based on beta coefficient)      |
| <i>FTO</i> rs9939609            | Muscle area                   | AA homozygotes had a larger vastus lateralis muscle area (Khanal et al., 2020) [19]                                                                                     | AA=2, AT=1, TT=0                                   |
| <i>HIF1A</i> rs11549465         | Oxygen consumption capacity   | TT associated with higher $V_{O_{2max}}$ among elderly (Prior et al., 2003) [23]                                                                                        | TT=2, CT=1, CC=0                                   |
|                                 | Strength/power athlete status | Overrepresentation of TT genotype in weightlifters, wrestlers and power-oriented athletes compared to controls (Ahmetov et al., 2008 [1], Drozdovska et al., 2013 [10]) |                                                    |
| <i>ID3</i> rs11574              | Obesity-related indices       | A-allele associated with increment in BMI and fat mass (Svendstrup et al., 2018) [30]                                                                                   | TT=0, CT=1, CC=2 (based on beta coefficient)       |
| <i>IGF1</i> rs35767             | Body composition              | GG homozygotes had greater total fat but lower lean and muscle mass (Kostek et al., 2010) [20]                                                                          | AA=2, AG=1, GG=0                                   |
| <i>IL6</i> rs1800795            | Elite athlete status          | Overrepresentation of G- allele among weightlifters, jumpers, and elite athletes (Ruiz et al., 2010 [25], Cenikli et al., 2016 [3])                                     | GG=2, GC=1, CC=0                                   |

|                                                               |                                                                          |                                                                                                                                                                                                                                                                                                                                                                                          |                                                                                                                                                                                                      |
|---------------------------------------------------------------|--------------------------------------------------------------------------|------------------------------------------------------------------------------------------------------------------------------------------------------------------------------------------------------------------------------------------------------------------------------------------------------------------------------------------------------------------------------------------|------------------------------------------------------------------------------------------------------------------------------------------------------------------------------------------------------|
| <i>MTHFR</i><br>rs1801131<br>rs1537516<br>rs17421511          | Strength/sprint athlete status<br><br>Maximal rate of oxygen consumption | Overrepresentation of rs1801131 C-allele among strength and sprint athletes (Zarebska et al., 2014) [36]<br><br>rs1801131 C-allele carriers had greater improvement in $VO_{2max}$ during training (Ciężczyk et al., 2016) [7]                                                                                                                                                           | <i>MTHFR</i> rs1801131 (GG=2, GT=1, TT=0)<br><br><i>MTHFR</i> rs1537516 (AA=0, AG=1, GG=2) (based on beta coefficient)<br><br><i>MTHFR</i> rs17421511 (AA=2, AG=1, GG=0) (based on beta coefficient) |
| <i>PTK2</i><br>rs7843014,<br>rs7460                           | Specific force                                                           | AA homozygotes had greater vastus lateralis specific force in healthy population (Erskine et al., 2012 [12], Stebbings et al., 2017 [29])                                                                                                                                                                                                                                                | <i>PTK2</i> rs7843014 (AA=2, AC=1, CC=0)<br><br><i>PTK2</i> rs7460 (AA=2, AT=1, TT=0)                                                                                                                |
| <i>TRHR</i> rs7832552                                         | Lean body mass<br><br>Sarcopenia                                         | T-allele favoured greater lean body mass (Liu et al., 2009 [21], Lunardi et al., 2013 [22])<br><br>C-allele carriers at higher risk of sarcopenia than TT homozygotes (Khanal et al., 2020) [19]                                                                                                                                                                                         | TT=2, TC=1, CC=0                                                                                                                                                                                     |
| <i>TTN</i> rs10497520                                         | Endurance running performance                                            | T-allele carriers had better marathon performance (Stebbins et al., 2018) [28]                                                                                                                                                                                                                                                                                                           | TT=2, CT=1, CC=0                                                                                                                                                                                     |
| <i>VDR</i> rs2228570                                          | Muscle size<br><br>Knee strength                                         | C-allele associated with lower fat-free-mass (Roth et al., 2004) [24]<br><br>C/CC allele/genotype had lower knee strength compared to f-allele carriers (Windelinckx et al., 2007 [34], Hopkinson et al., 2008 [18])                                                                                                                                                                     | AA=2, AG=1, GG=0                                                                                                                                                                                     |
| <i>MSTN</i> rs1805086                                         | Muscle strength/muscle size                                              | C-allele associated with lower muscle strength (Seibert et al., 2001 [26], Corsi et al., 2002 [8])<br><br>C-allele associated with lower muscle mass among elderly women (González-Freire et al., 2010) [14]                                                                                                                                                                             | TT=2, CT=1, CC=0                                                                                                                                                                                     |
| <i>COL1A1</i> rs1800012                                       | Muscle strength                                                          | A-allele associated with lower handgrip and biceps strength in elderly (Van Pottelbergh et al., 2001 [31])                                                                                                                                                                                                                                                                               | CC=2, AC=1, AA=0                                                                                                                                                                                     |
| <i>ACVR1B</i><br>rs2854464<br><br><i>ACVR1B</i><br>rs10783485 | Muscle strength<br><br>Sprint/power athlete status<br><br>Muscle mass    | A-allele associated with higher knee strength (Windelinckx et al., 2011 [35])<br><br>A-allele overrepresented in sprint and power athletes (Voisin et al., 2016 [32])<br><br>A-allele associated with higher SMM (He et al., 2018 [17])                                                                                                                                                  | GG=0, GA=1, AA=2<br><br>GG=0, GT=1, TT=2                                                                                                                                                             |
| <i>NOS3</i> rs1799983                                         | Power athlete status<br><br>Stroke volume<br><br>Sarcopenia              | T-allele common among power athletes (Gómez-Gallego et al., 2009 [13], Sessa et al., 2011 [27], Zmijewski et al., 2018 [38], Eider et al., 2014 [11])<br><br>Postmenopausal women with T-allele had higher stroke volume during dynamic exercise (Hand et al., 2006) [15]<br><br>T-allele carriers had higher skeletal muscle mass above sarcopenic threshold (Khanal et al., 2020) [19] | TT=2, CT=1, CC=0                                                                                                                                                                                     |

1. Ahmetov, II, Hakimullina, A.M., Lyubaeva, E.V., Vinogradova, O.L. and Rogozkin, V.A. Effect of HIF1A gene polymorphism on human muscle performance. *Bulletin of experimental biology and medicine*. **2008**, 146, 351–353.
2. Arking, D.E., Fallin, D.M., Fried, L.P., Li, T., Beamer, B.A., Xue, Q.L., Chakravarti, A. and Walston, J. Variation in the ciliary neurotrophic factor gene and muscle strength in older Caucasian women. *Journal of the American Geriatrics Society*. **2006**, 54, 823–826.
3. Cenikli, A., Nursal, A., Tural, E., Polat, Y., Tasmektepligil, M. and Yigit, S. The Correlation Between Rs1800795 Variant of IL-6 and sports performance among turkish elite athletes. *International Journal of Humanities Social Sciences and Education*. **2016**, 3, 1–5.
4. Charbonneau, D.E., Hanson, E.D., Ludlow, A.T., Delmonico, M.J., Hurley, B.F. and Roth, S.M. ACE genotype and the muscle hypertrophic and strength responses to strength training. *Medicine and science in sports and exercise*. **2008**, 40, 677.
5. Chen, W., Zhang, B., Li, Y. and Liang, T. Association Between rs1815739 Polymorphism of ACTN3 Gene and Athletic Ability in Chinese Sprinters. *Journal of Science in Sport and Exercise*, **2020**, 2, 113–119.
6. Cho, J., Lee, I. and Kang, H. ACTN3 gene and susceptibility to sarcopenia and osteoporotic status in older Korean adults. *BioMed research international*. 2017
7. Ciężczyk, P., Zarębska, A., Jastrzębski, Z., Sawczyn, M., Kozakiewicz-Drobnik, I., Leońska-Duniec, A., Kaczmarczyk, M., Maciejewska-Skrendo, A., Żmijewski, P. and Trybek, G. Does the MTHFR A1298C Polymorphism Modulate the Cardiorespiratory Response to Training? *Journal of human kinetics*. **2016**, 54, 43–53.
8. Corsi, A.M., Ferrucci, L., Gozzini, A., Tanini, A. and Brandi, M.L. Myostatin polymorphisms and age-related sarcopenia in the Italian population. *Journal of the American Geriatrics Society*. **2002**, 50, 1463.
9. De Mars, G., Windelinckx, A., Beunen, G., Delecluse, C., Lefevre, J. and Thomis, M.A.I. Polymorphisms in the CNTF and CNTF receptor genes are associated with muscle strength in men and women. *Journal of Applied Physiology*. **2007**, 102, 1824–1831.
10. Drozdovska, S., Dosenko, V., Ahmetov, I. and Ilyin, V. The association of gene polymorphisms with athlete status in Ukrainians. *Biology of sport*. **2013**, 30, 163.
11. Eider, J., Ficek, K., Kaczmarczyk, M., Maciejewska-Karłowska, A., Sawczuk, M. and Ciężczyk, P. Endothelial nitric oxide synthase g894t (rs1799983) gene polymorphism in polish athletes. *Open Life Sciences*. **2014**, 9, 260–267.
12. Erskine, R.M., Williams, A.G., Jones, D.A., Stewart, C.E. and Degens, H. Do PTK2 gene polymorphisms contribute to the interindividual variability in muscle strength and the response to resistance training? A preliminary report. *Journal of applied physiology*. **2012**, 112, 1329–1334.
13. Gómez-Gallego, F., Ruiz, J.R., Buxens, A., Artieda, M., Arteta, D., Santiago, C., Rodríguez-Romo, G., Lao, J.I. and Lucia, A. The- 786 T/C polymorphism of the NOS3 gene is associated with elite performance in power sports. *European journal of applied physiology*. **2009**, 107, 565–569.
14. González-Freire, M., Rodríguez-Romo, G., Santiago, C., Bustamante-ARA, N., Yvert, T., Gómez-Gallego, F., Rexach, J.A.S., Ruiz, J.R. and Lucia, A. The K153R variant in the myostatin gene and sarcopenia at the end of the human lifespan. *Age*. **2010**, 32, 405–409.
15. Hand, B.D., Mccole, S.D., Brown, M.D., Park, J.J., Ferrell, R.E., Huberty, A., Douglass, L.W. and Hagberg, J.M. NOS3 gene polymorphisms and exercise hemodynamics in postmenopausal women. *International journal of sports medicine*. **2006**, 27, 951–958.
16. He, L., Khanal, P., Morse, C.I., Williams, A. and Thomis, M. Associations of combined genetic and epigenetic scores with muscle size and muscle strength: A pilot study in older women. *Journal of Cachexia, Sarcopenia and Muscle*. **2020**.
17. He, L., Van Roie, E., Bogaerts, A., Morse, C.I., Delecluse, C., Verschueren, S. and Thomis, M. Genetic predisposition score predicts the increases of knee strength and muscle mass after one-year exercise in healthy elderly. *Experimental gerontology*. **2018**, 111, 17–26.
18. Hopkinson, N.S., Li, K.W., Kehoe, A., Humphries, S.E., Roughton, M., Moxham, J., Montgomery, H. and Polkey, M.I. Vitamin D receptor genotypes influence quadriceps strength in chronic obstructive pulmonary disease. *The American journal of clinical nutrition*. **2008**, 87, 385–390.
19. Khanal, P., He, L., Stebbings, G., Onambele-Pearson, G.L., Degens, H., Williams, A., Thomis, M. and Morse, C.I. Prevalence and association of single nucleotide polymorphisms with sarcopenia in older women depends on definition. *Scientific reports*. **2020**, 10, 1–9.
20. Kostek, M.C., Devaney, J.M., Gordish-Dressman, H., Harris, T.B., Thompson, P.D., Clarkson, P.M., Angelopoulos, T.J., Gordon, P.M., Moyna, N.M. and Pescatello, L.S. A polymorphism near IGF1 is associated with body composition and muscle function in women from the Health, Aging, and Body Composition Study. *European journal of applied physiology*. **2010**, 110, 315–324.
21. Liu, X.-G., Tan, L.-J., Lei, S.-F., Liu, Y.-J., Shen, H., Wang, L., Yan, H., Guo, Y.-F., Xiong, D.-H. and Chen, X.-D. Genome-wide association and replication studies identified TRHR as an important gene for lean body mass. *The American Journal of Human Genetics*. **2009**, 84, 418–423.

22. Lunardi, C.C., Lima, R.M., Pereira, R.W., Leite, T.K.M., Siqueira, A.B.M. and Oliveira, R.J. Association between polymorphisms in the TRHR gene, fat-free mass, and muscle strength in older women. *Age*. **2013**, 35, 2477–2483.
23. Prior, S.J., Hagberg, J.M., Phares, D.A., Brown, M.D., Fairfull, L., Ferrell, R.E. and Roth, S.M. Sequence variation in hypoxia-inducible factor 1 $\alpha$  (HIF1A): Association with maximal oxygen consumption. *Physiological genomics*. **2003**, 15, 20–26.
24. Roth, S.M., Zmuda, J.M., Cauley, J.A., Shea, P.R. and Ferrell, R.E. Vitamin D receptor genotype is associated with fat-free mass and sarcopenia in elderly men. *The Journals of Gerontology Series A: Biological Sciences and Medical Sciences*. **2004**, 59, B10–B15.
25. Ruiz, J.R., Buxens, A., Artieda, M., Arteta, D., Santiago, C., Rodríguez-Romo, G., Lao, J.I., Gómez-Gallego, F. and Lucia, A. The– 174 G/C polymorphism of the IL6 gene is associated with elite power performance. *Journal of science and medicine in sport*. **2010**, 13, 549–553.
26. Seibert, M.J., Xue, Q.L., Fried, L.P. and Walston, J.D. Polymorphic variation in the human myostatin (GDF-8) gene and association with strength measures in the women's health and aging study II cohort. *Journal of the American Geriatrics Society*. **2001**, 49, 1093–1096.
27. Sessa, F., Chetta, M., Petito, A., Franzetti, M., Bafunno, V., Pisanelli, D., Sarno, M., Iuso, S. and Margaglione, M. Gene polymorphisms and sport attitude in Italian athletes. *Genetic testing and molecular biomarkers*. **2011**, 15, 285–290.
28. Stebbings, G.K., Williams, A.G., Herbert, A.J., Lockey, S.J., Heffernan, S.M., Erskine, R.M., Morse, C.I. and DAY, S.H. TTN genotype is associated with fascicle length and marathon running performance. *Scandinavian journal of medicine & science in sports*. **2018**, 28, 400–406.
29. Stebbings, G.K., Williams, A.G., Morse, C.I. and Day, S.H. Polymorphisms in PTK2 are associated with skeletal muscle specific force: An independent replication study. *European journal of applied physiology*. **2017**, 117, 713–720.
30. Svendstrup, M., Appel, E.V.R., Sandholt, C.H., Ahluwalia, T.S., Ångquist, L.H., Thuesen, B.H., Jørgensen, M.E., Pedersen, O., Grarup, N. and Hansen, T. Prospective studies exploring the possible impact of an ID3 polymorphism on changes in obesity measures. *Obesity*. **2018**, 26, 747–754.
31. Van Pottelbergh, I., Goemaere, S., Nuytinck, L., De Paepe, A. and Kaufman, J.M. Association of the type I collagen  $\alpha$ 1 Sp1 polymorphism, bone density and upper limb muscle strength in community-dwelling elderly men. *Osteoporosis International*. **2001**, 12, 895–901.
32. Voisin, S., Guilherme, J.P.F.L., Yan, X., Pushkarev, V.P., Cieszczyk, P., Massidda, M., Calò, C.M., Dyatlov, D.A., Kolupaev, V.A. and Pushkareva, Y.E. ACVR1B rs2854464 is associated with sprint/power athletic status in a large cohort of Europeans but not Brazilians. *PLoS ONE*. **2016**, 11, e0156316.
33. Walsh, S., Liu, D., Metter, E.J., Ferrucci, L. and Roth, S.M. ACTN3 genotype is associated with muscle phenotypes in women across the adult age span. *Journal of Applied Physiology*. **2008**, 105, 1486–1491.
34. Windelinckx, A., De Mars, G., Beunen, G., Aerssens, J., Delecluse, C., Lefevre, J. and Thomis, M.A.I. Polymorphisms in the vitamin D receptor gene are associated with muscle strength in men and women. *Osteoporosis International*. **2007**, 18, 1235–1242.
35. Windelinckx, A., De Mars, G., Huygens, W., Peeters, M.W., Vincent, B., Wijmenga, C., Lambrechts, D., Delecluse, C., Roth, S.M. and Metter, E.J. Comprehensive fine mapping of chr12q12-14 and follow-up replication identify activin receptor 1B (ACVR1B) as a muscle strength gene. *European Journal of Human Genetics*. **2011**, 19, 208.
36. Zarebska, A., Ahmetov, I.I., Sawczyn, S., Weiner, A.S., Kaczmarczyk, M., Ficek, K., Maciejewska-Karlowska, A., Sawczuk, M., Leonska-Duniec, A. and Klocek, T. Association of the MTHFR 1298A> C (rs1801131) polymorphism with speed and strength sports in Russian and Polish athletes. *Journal of sports sciences*. **2014**, 32, 375–382.
37. Zempo, H., Tanabe, K., Murakami, H., Iemitsu, M., Maeda, S. and Kuno, S. ACTN3 polymorphism affects thigh muscle area. *International journal of sports medicine*. **2010**, 31, 138–142.
38. Zmijewski, P., Cieszczyk, P. and Ahmetov, I.I. The NOS3 G894T (rs1799983) and-786T/C (rs2070744) polymorphisms are associated with elite swimmer status. *Biol Sport*. **2018**, 35, 313–319.
